# Supplementary material for: Microclimate of Air Cavities in Ventilated Roof and Façade Systems in Nordic Climates
Source: MDPI journal article supplement (doi:10.3390/buildings12050683), 2022-05-19
Supplement: s1 [file s1]

Table S1. Search strings.

| Date for updated numbers:                               | 22.10.2021         |                  |                    | 27.10.2021         |                                                     | 22.10.2021         | 28.10.2021         |                                                      |                                                      |
|---------------------------------------------------------|--------------------|------------------|--------------------|--------------------|-----------------------------------------------------|--------------------|--------------------|------------------------------------------------------|------------------------------------------------------|
| Literature database:                                    | Scopus             |                  |                    | ScienceDirect      |                                                     | Google Sclar       | Web of Science     |                                                      |                                                      |
| Search filters:                                         | No filter employed | English          | English            | No filter employed | English                                             | No filter employed | No filter employed | English                                              | English                                              |
|                                                         |                    | Engineering      | Engineering        |                    | Engineering                                         |                    |                    | Engineering Civil + Construction Building Technology | Engineering Civil + Construction Building Technology |
|                                                         |                    | Article + Review | Article + Review   |                    | Review articles + Research articles + Book chapters |                    |                    | Article + Review                                     | Article + Review                                     |
|                                                         |                    |                  | Relevant countries |                    |                                                     |                    |                    |                                                      | Relevant countries                                   |
| "Air cavity"                                            | 6066               | 2187             | 236                | 5842               | 2446                                                | 28700              | 1516               | 105                                                  | 9                                                    |
| "Air cavity" + BIPV                                     | 33                 | 16               | 2                  |                    |                                                     | 514                |                    |                                                      |                                                      |
| "Air cavity" + ventilated                               | 448                | 243              | 32                 | 854                | 526                                                 | 6360               |                    |                                                      |                                                      |
| "Air cavity" + ventilation + facade                     | 169                | 87               | 15                 |                    |                                                     | 2130               |                    |                                                      |                                                      |
| "Air cavity" + ventilation + facade + condensation      | 18                 | 11               | 1                  |                    |                                                     | 702                |                    |                                                      |                                                      |
| "Air cavity" + ventilation + "wood facade"              | 0                  | 0                | 0                  | 2                  | 2                                                   | 0                  |                    |                                                      |                                                      |
| "Air cavity" + ventilation + wood facade                | 40                 | 28               | 6                  | 217                | 145                                                 | 1040               |                    |                                                      |                                                      |
| "Air cavity" + wood facade                              | 58                 | 40               | 7                  | 287                | 189                                                 | 1470               |                    |                                                      |                                                      |
| "Air gap"                                               | 49169              | 17975            | 1682               | 34443              | 14156                                               | 385000             | 14999              | 162                                                  | 6                                                    |
| "Air gap" + BIPV                                        | 228                | 87               | 16                 |                    |                                                     | 1780               |                    |                                                      |                                                      |
| "Air gap" + ventilated                                  | 646                | 300              | 39                 | 2081               | 1164                                                | 19300              |                    |                                                      |                                                      |
| "Air gap" + ventilation + facade                        | 310                | 146              | 20                 |                    |                                                     | 6190               |                    |                                                      |                                                      |
| "Air gap" + ventilation + facade + condensation         | 23                 | 13               | 1                  |                    |                                                     | 1780               |                    |                                                      |                                                      |
| "Air gap" + ventilation + "wood facade"                 | 0                  | 0                | 0                  | 2                  | 1                                                   | 20                 |                    |                                                      |                                                      |
| "Air gap" + ventilation + wood facade                   | 46                 | 29               | 4                  | 447                | 260                                                 | 3030               |                    |                                                      |                                                      |
| "Air gap" + wood facade                                 | 78                 | 44               | 6                  | 587                | 349                                                 | 3700               |                    |                                                      |                                                      |
| BIPV                                                    | 5963               | 2083             | 305                | 756                | 299                                                 | 24600              | 1582               | 1046                                                 | 70                                                   |
| BIPVs                                                   | 226                | 86               | 9                  |                    |                                                     | 1380               |                    |                                                      |                                                      |
| "Building envelope"                                     | 24433              | 11186            | 1500               |                    |                                                     | 78100              |                    |                                                      |                                                      |
| "Building integrated photovoltaics"                     | 4033               | 1320             | 204                |                    |                                                     | 12800              |                    |                                                      |                                                      |
| "Building physics"                                      | 11809              | 5139             | 1032               |                    |                                                     | 36000              |                    |                                                      |                                                      |
| "Cavity ventilation"                                    | 132                | 58               | 9                  | 198                | 96                                                  | 1050               | 57                 | 27                                                   | 5                                                    |
| "Cavity-ventilated"                                     | 183                | 80               | 2                  | 40                 | 27                                                  | 410                |                    |                                                      |                                                      |
| Cavity + ventilated                                     | 6813               | 2514             | 243                | 19851              | 2711                                                | 106000             |                    |                                                      |                                                      |
| "Cold climate"                                          | 33993              | 5767             | 1093               |                    |                                                     | 151000             |                    |                                                      |                                                      |
| Condensation                                            | 620836             | 63128            | 5555               |                    |                                                     | 3300000            |                    |                                                      |                                                      |
| "Condensation potential"                                | 153                | 56               | 2                  |                    |                                                     | 1110               |                    |                                                      |                                                      |
| "Decay potential"                                       | 276                | 20               | 9                  |                    |                                                     | 2490               |                    |                                                      |                                                      |
| "Driving rain"                                          | 714                | 359              | 91                 | 761                | 397                                                 | 17000              | 198                | 102                                                  | 28                                                   |
| Evaporation                                             | 500725             | 93900            | 6808               |                    |                                                     | 4160000            |                    |                                                      |                                                      |
| "External wall"                                         | 7077               | 2718             | 350                |                    |                                                     | 66000              |                    |                                                      |                                                      |
| Facade                                                  | 52546              | 15155            | 2043               |                    |                                                     | 798000             |                    |                                                      |                                                      |
| "Harsh climate"                                         | 1383               | 182              | 28                 |                    |                                                     | 34000              |                    |                                                      |                                                      |
| "Hygrothermal conditions"                               | 1742               | 861              | 96                 |                    |                                                     | 4460               |                    |                                                      |                                                      |
| "Hygrothermal conditions" + facade                      | 121                | 74               | 28                 |                    |                                                     | 800                |                    |                                                      |                                                      |
| "Hygrothermal conditions" + facade + wood               | 70                 | 49               | 22                 |                    |                                                     | 588                | 0                  | 0                                                    | 0                                                    |
| "Moisture-induced cladding deformation"                 | 2                  | 2                | 2                  |                    |                                                     | 5                  |                    |                                                      |                                                      |
| "Nordic climate"                                        | 936                | 159              | 76                 |                    |                                                     | 3860               |                    |                                                      |                                                      |
| "Pitched roof"                                          | 1312               | 669              | 119                |                    |                                                     | 21500              |                    |                                                      |                                                      |
| "Pitched wooden roof"                                   | 10                 | 8                | 7                  |                    |                                                     | 106                |                    |                                                      |                                                      |
| "Potential Risk of Wood Decay"                          | 1                  | 1                | 0                  |                    |                                                     | 4                  |                    |                                                      |                                                      |
| "Rain penetration"                                      | 354                | 191              | 28                 |                    |                                                     | 3290               |                    |                                                      |                                                      |
| "Rainscreen wall"                                       | 131                | 86               | 7                  |                    |                                                     | 216                |                    |                                                      |                                                      |
| Rainscreen + wall                                       | 286                | 163              | 27                 | 153                | 88                                                  | 3290               | 41                 | 23                                                   | 4                                                    |
| "Resistance of external walls against rain penetration" | 2                  | 2                | 0                  |                    |                                                     | 7                  |                    |                                                      |                                                      |
| "Solar cell"                                            | 589486             | 134898           | 8230               |                    |                                                     | 2330000            |                    |                                                      |                                                      |
| "Torrential rain"                                       | 2772               | 268              | 7                  |                    |                                                     |                    |                    |                                                      |                                                      |
| "Ventilated cavity"                                     | 1676               | 888              | 54                 |                    |                                                     | 3910               | 249                | 53                                                   | 2                                                    |
| Ventilation                                             | 538338             | 46874            | 6786               |                    |                                                     | 3860000            |                    |                                                      |                                                      |
| "Ventilation drying"                                    | 132                | 55               | 7                  |                    |                                                     | 879                |                    |                                                      |                                                      |
| "Wind-driven rain"                                      | 1731               | 726              | 124                | 832                | 463                                                 | 7440               | 443                | 221                                                  | 24                                                   |
| "wind-driven rain" + wood                               | 453                | 235              | 47                 |                    |                                                     |                    |                    |                                                      |                                                      |
| Wood + facade                                           | 5748               | 1859             | 327                | 6263               | 2672                                                | 142000             | 307                | 73                                                   | 15                                                   |
| "Wood cladding"                                         | 80                 | 25               | 11                 |                    |                                                     | 1100               |                    |                                                      |                                                      |
| "Wood coating"                                          | 2363               | 287              | 39                 |                    |                                                     | 2760               |                    |                                                      |                                                      |
| "Wood construction"                                     | 3055               | 1171             | 91                 |                    |                                                     | 23900              |                    |                                                      |                                                      |
| "Wood decay"                                            | 12309              | 623              | 68                 |                    |                                                     | 37100              |                    |                                                      |                                                      |
| "Wood facade"                                           | 32                 | 4                | 2                  | 28                 | 16                                                  | 443                | 5                  | 1                                                    | 1                                                    |
| "Wood facade" + "nordic climate"                        | 0                  | 0                | 0                  |                    |                                                     | 1                  |                    |                                                      |                                                      |
| "Wood structures"                                       | 9501               | 1824             | 242                |                    |                                                     | 19700              |                    |                                                      |                                                      |
| "Wooden claddings"                                      | 175                | 49               | 23                 | 113                | 64                                                  | 318                | 11                 | 1                                                    | 1                                                    |
| "Doubel-skin facade"                                    | 705                | 260              | 42                 |                    |                                                     |                    |                    |                                                      |                                                      |
| DSF                                                     | 3352               | 632              | 66                 |                    |                                                     |                    |                    |                                                      |                                                      |
